# Supplementary material
Source: PubMed Central journal article supplement (PMC3558808)
Supplement: supp_mol.112.080879_Supplementary_Data.pdf [file supp_mol.112.080879_Supplementary_Data.pdf]

## CB<sub>1</sub> RECEPTOR ALLOSTERIC MODULATORS DISPLAY BOTH AGONIST AND SIGNALING PATHWAY SPECIFICITY

Gemma L. Baillie, James G. Horswill, Sharon Anavi-Goffer, Patricia H. Reggio, Daniele Bolognini, Mary E. Abood, Sean McAllister, Phillip G. Strange, Gary J. Stephens, Roger G. Pertwee & Ruth A. Ross.

Molecular Pharmacology

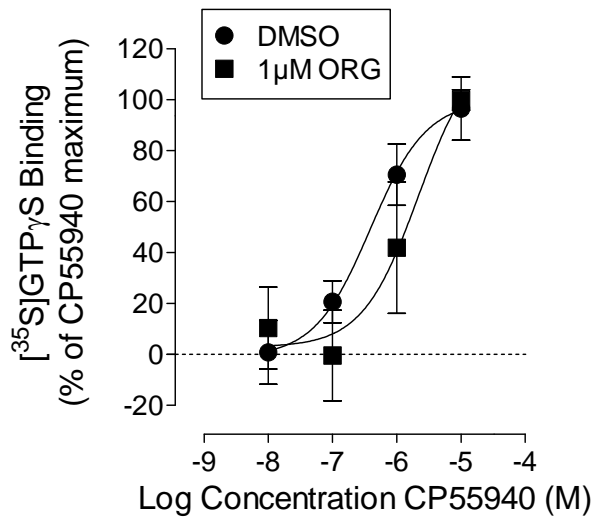

### Supplementary Figure 1

Effect of Org 27569 (1 μM) on CP55940 stimulated [<sup>35</sup>S]GTP<sub>γ</sub>S binding in membranes from hCB<sub>1</sub> cells mutated at W5:43. Symbols represent mean values ± SEM from 4 to 6 experiments carried out in duplicate.
